# Supplementary material for: Efficacy of visceral fat estimation by dual bioelectrical impedance analysis in detecting cardiovascular risk factors in patients with type 2 diabetes
Source: Springer Nature journal article supplement (doi:10.1186/s12933-019-0941-y), 2019-10-22
Supplement: MOESM3 [file 17299360]

Figure.S3A

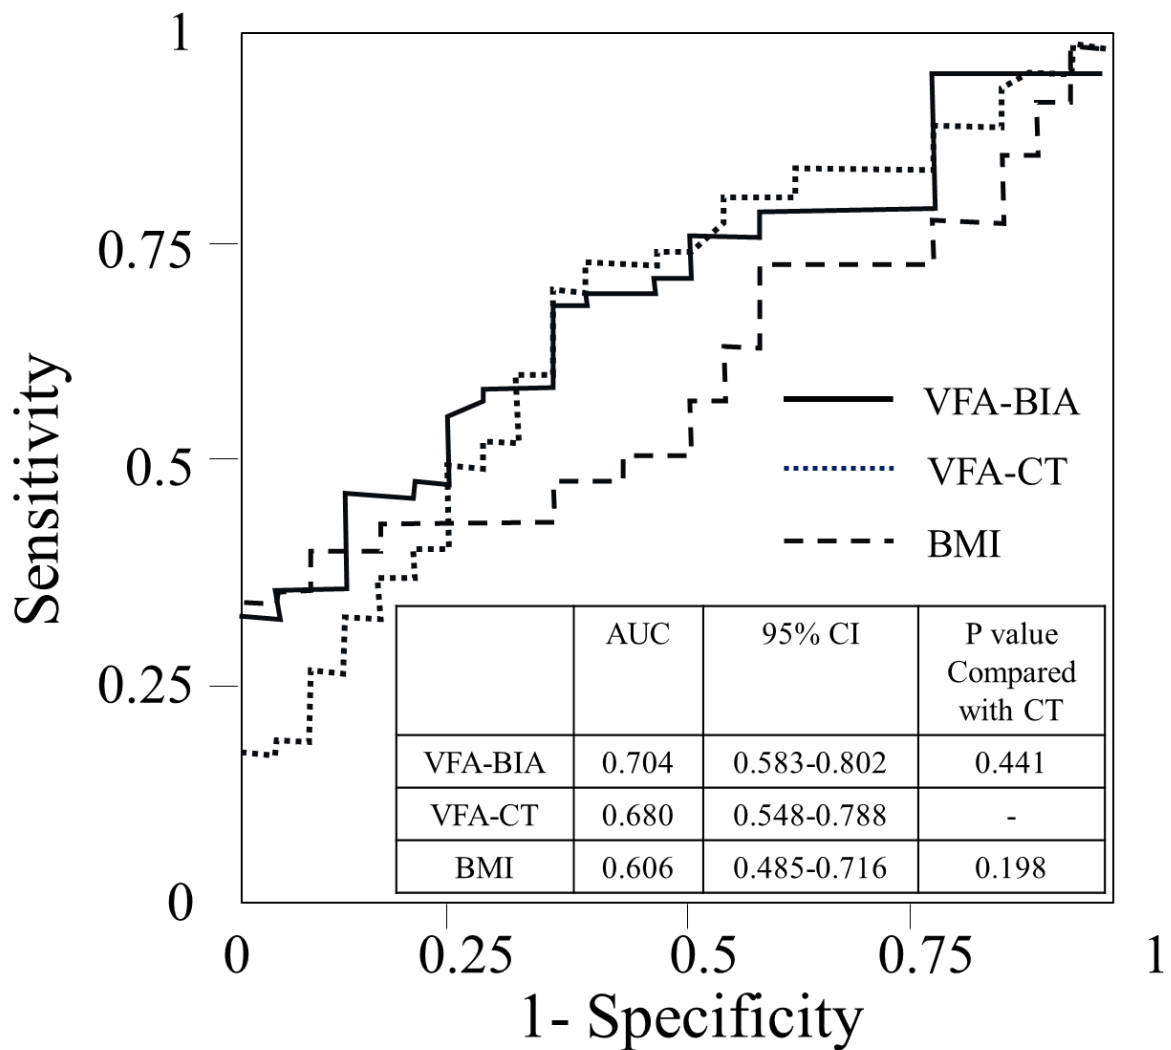

Figure.S3A The ROC for identifying the presence of hypertension. Hypertension was defined as SBP  $\geq$  140 mmHg and/or DBP  $\geq$  90 mmHg or under treatment. The curves are for the VFA -BIA (bold line), the VFA-CT (dotted line), and BMI (broken line).

Figure.S3B

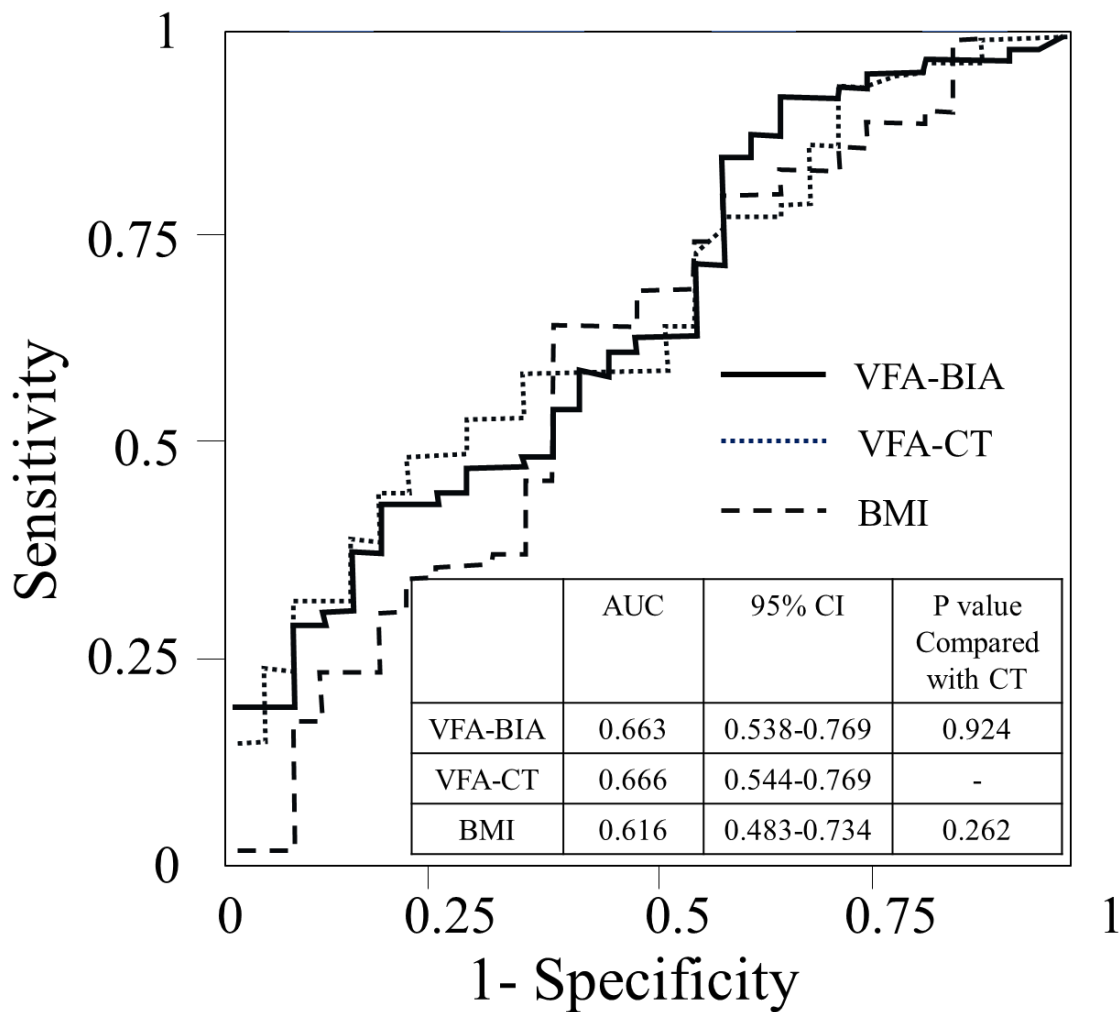

Figure.S3B The ROC for identifying the presence of dyslipidemia. Dyslipidemia was defined HDL-C < 40 mg/dL and/or triglycerides  $\geq$  150 mg/dL or under treatment. The curves are for the VFA -BIA (bold line), the VFA-CT (dotted line), and BMI (broken line).
